# Supplementary material for: Th1/Th2 polarization of peripheral immune response in atherothrombotic and cardioembolic stroke: a prospective study
Source: PubMed Central journal article supplement (PMC9525580; doi:10.1038/s41598-022-20515-x), 2022-09-30
Supplement: 41598_2022_20515_MOESM1_ESM.pdf [file 41598_2022_20515_MOESM1_ESM.pdf]

**Figure 1.** CONSORT flow Diagram of the study

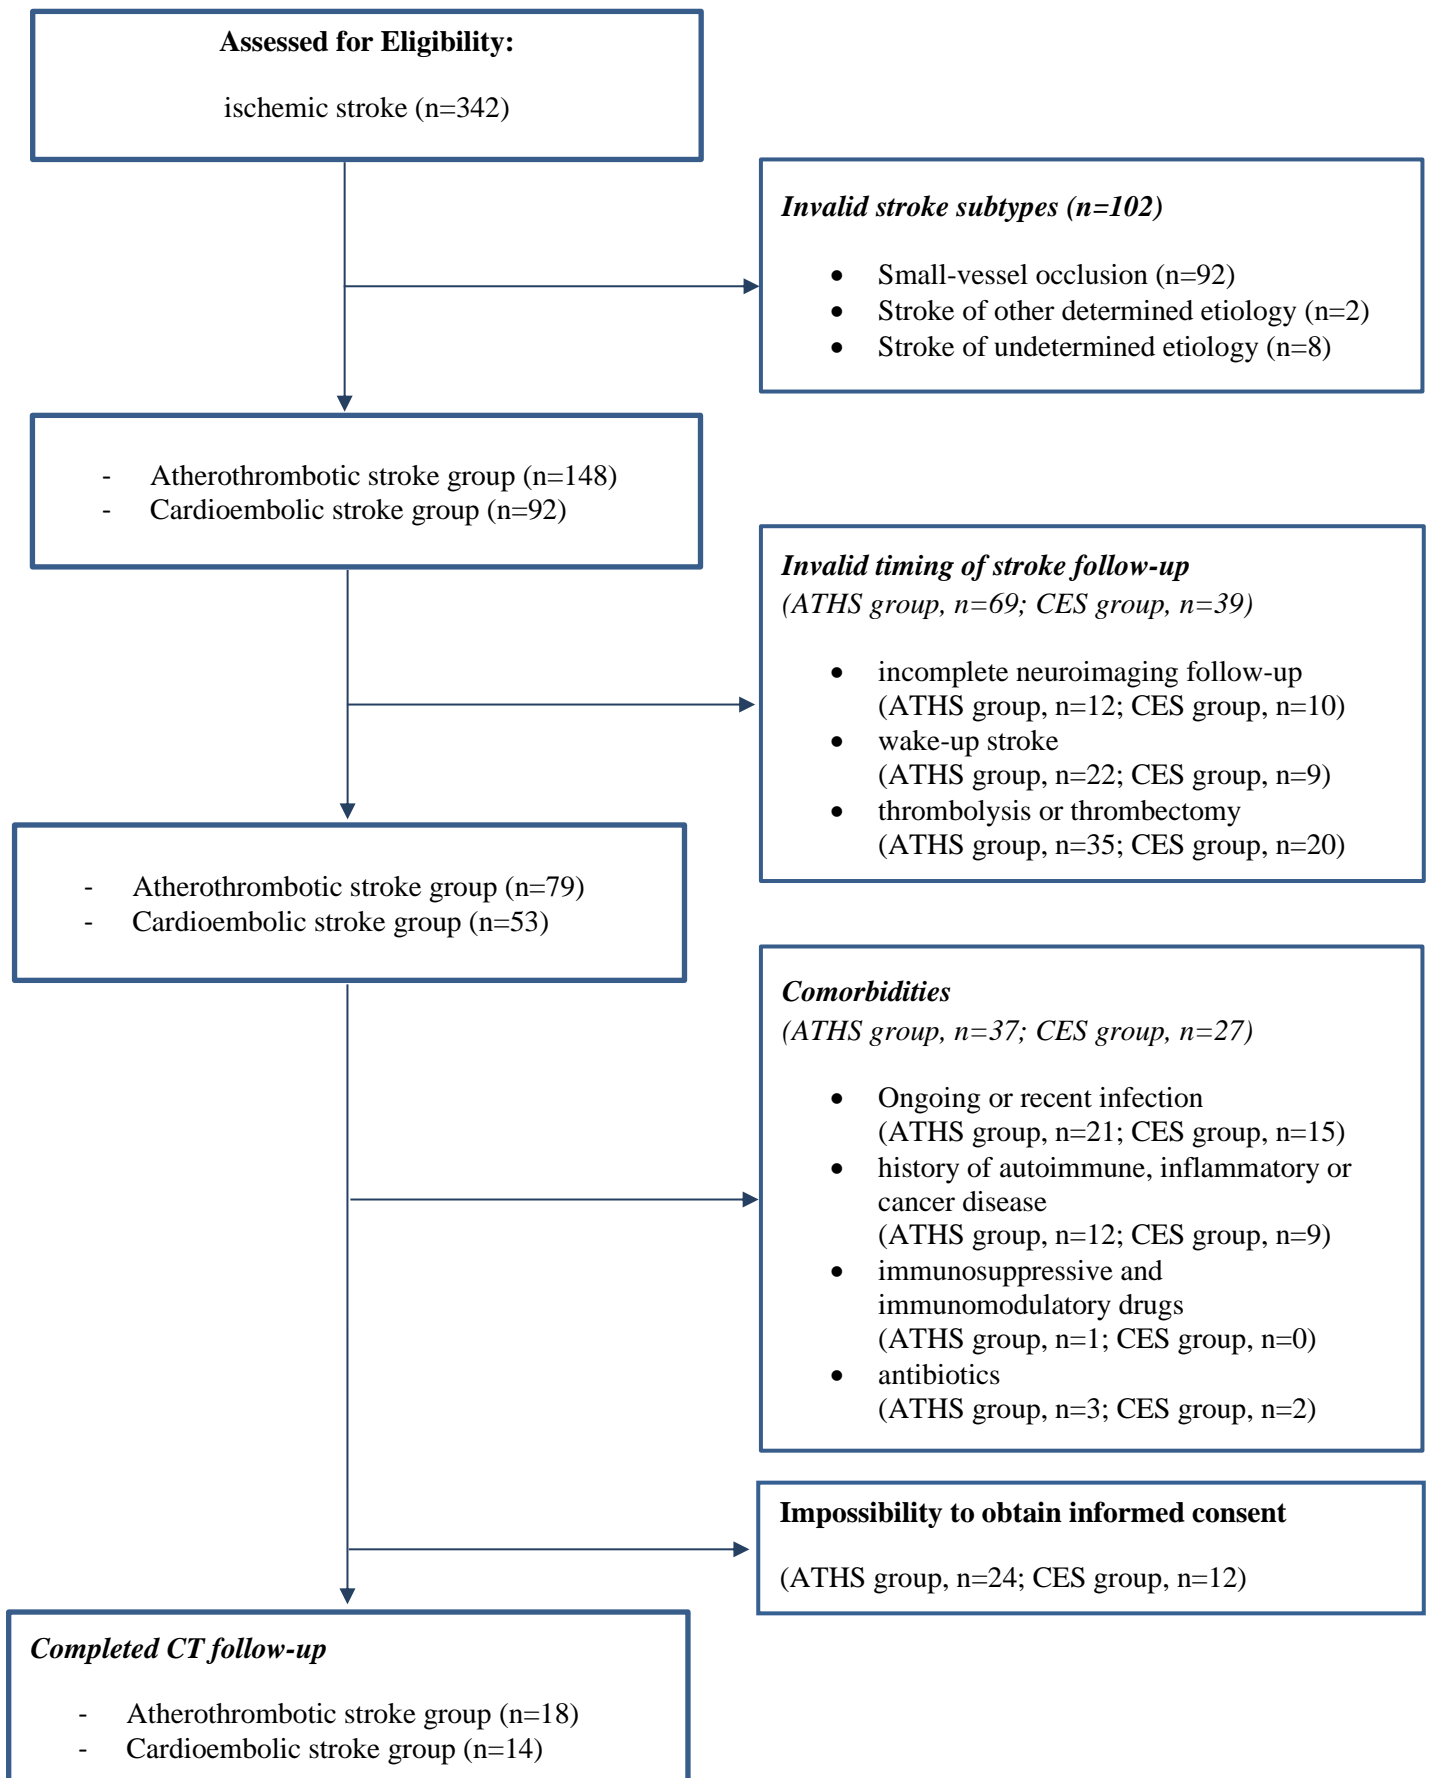

**Figure legend:** CONSORT flow diagram showing data on enrolment, number of patients in ATHS and CES group at different time points and causes of patient exclusion. ATHS: atherothrombotic stroke; CES: cardioembolic stroke.
